# Supplementary material for: Photoinduced radicals modulated NIR photothermal conversion in a photochromic inorganic–organic complex
Source: Royal Society of Chemistry journal article supplement (doi:10.1039/d3qi00534h), 2023-01-01
Supplement: d3qi00534h1.pdf [file d3qi00534h1.pdf]

## Supporting Information

### **Photoinduced Radicals Modulated NIR Photothermal Conversion in a Photochromic Inorganic-Organic Complex**

Zhe Wang,<sup>a</sup> Tieqiang Wang,<sup>a</sup> Junbiao Wu,<sup>\* a</sup> Zhuopeng Wang,<sup>a</sup> Jiyang Li,<sup>\* b</sup>

- a. *Department of Chemistry, College of Sciences, Northeastern University, Shenyang, Liaoning 110819, China. Email: wujunbiao@mail.neu.edu.cn;*
- b. *State Key Laboratory of Inorganic Synthesis and Preparative Chemistry, College of Chemistry, Jilin University, Changchun 130012, P. R. China. E-mail: lijyang@jlu.edu.cn*

## **Index**

|                                      |           |
|--------------------------------------|-----------|
| <b>1. Supplementary Figures.....</b> | <b>S2</b> |
| <b>2. Supplementary Table.....</b>   | <b>S9</b> |

## 1. Supplementary Figures

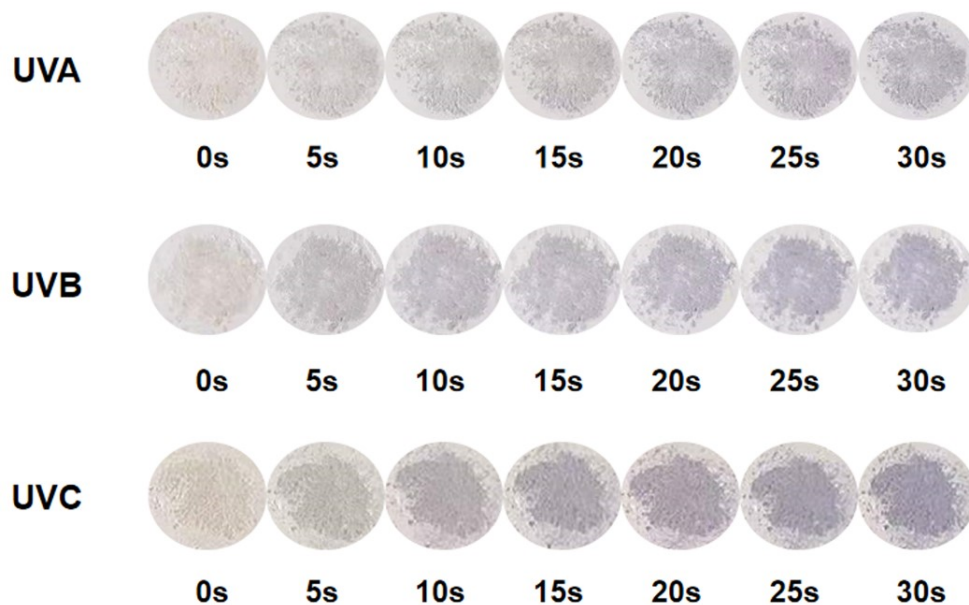

**Fig. S1** Photochromic behavior of NEU20 by different modes of UV light (UVA, UVB and UVC) irradiation.

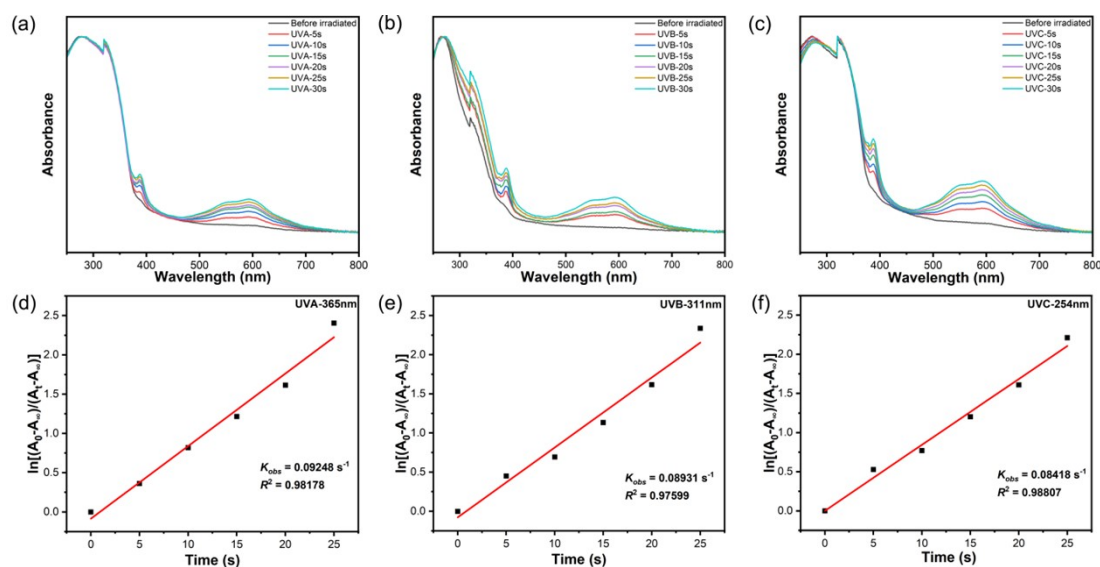

**Fig. S2** *In situ* time dependent UV-Vis spectra of NEU20 by different modes of UV light irradiation; (a) UVA light irradiation. (b) UVB light irradiation. (c) UVC light irradiation. First-order kinetic plot for change in absorbance at  $\lambda = 387 \text{ nm}$  by different modes of UV light irradiation, where  $A_0$ ,  $A_t$ , and  $A_\infty$  are the absorbance values at time zero, time  $t$ , and infinite time of the reaction, respectively; (d) UVA light irradiation. (e) UVB light irradiation. (f) UVC light irradiation.

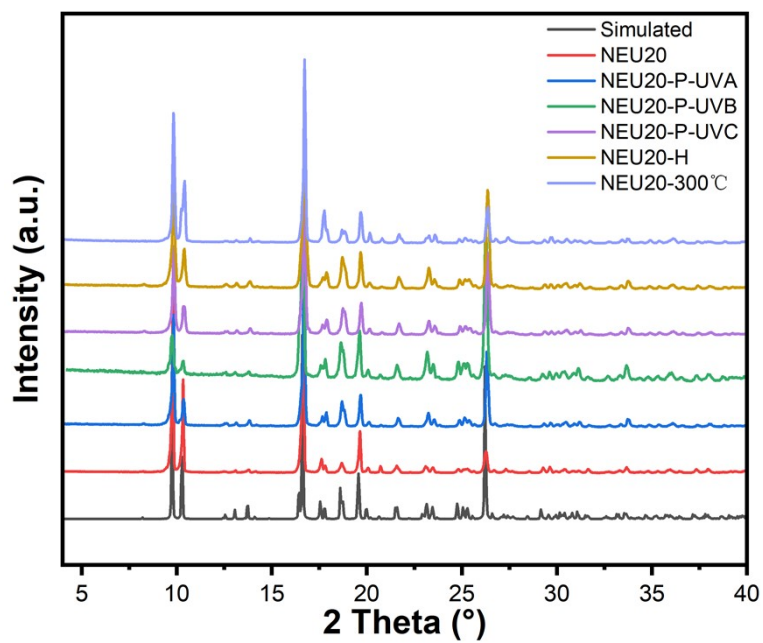

Fig. S3 PXRD for NEU20 and other samples that obtained by different modes.

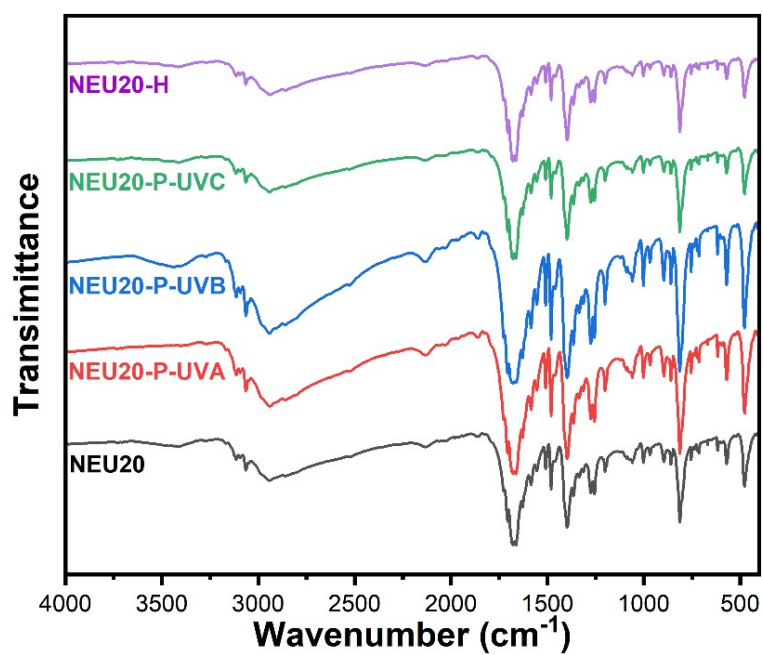

Fig. S4 IR spectra for NEU20 and other samples that obtained by different modes.

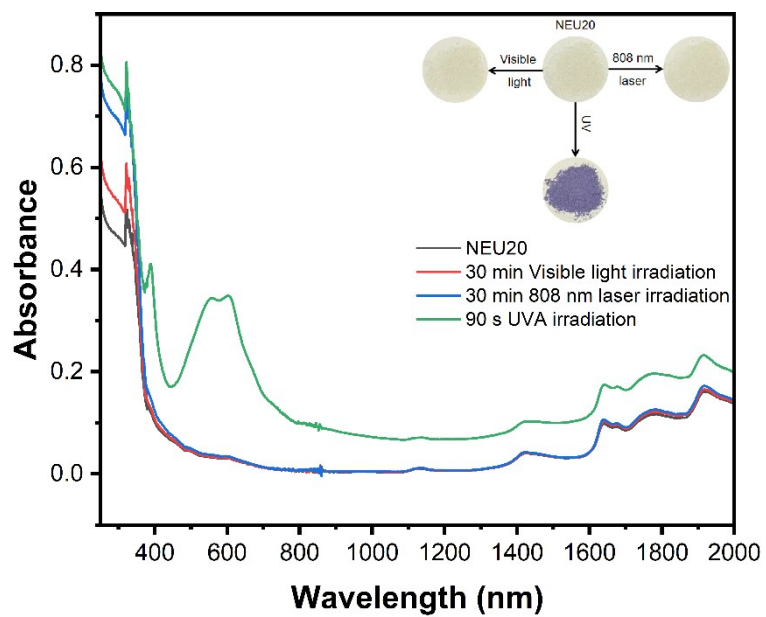

**Fig. S5** UV-Vis-IR spectra and photos of NEU20 and different light sources after irradiation.

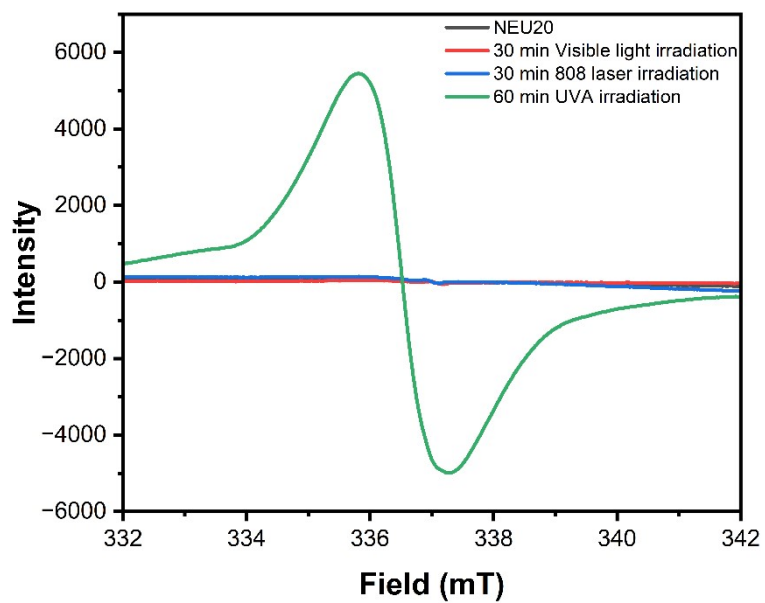

**Fig. S6** EPR spectra of NEU20 and different light sources after irradiation.

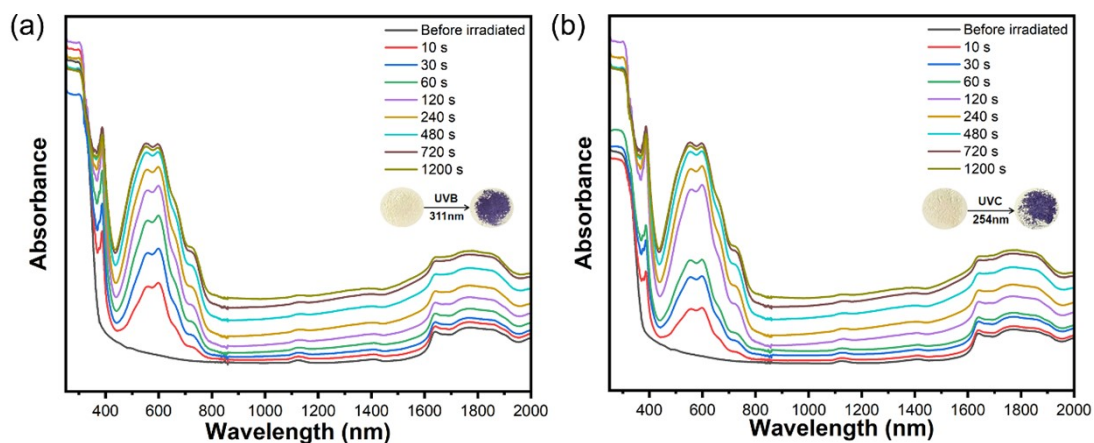

**Fig. S7** *In situ* time dependent UV-Vis spectra and photographs showing the photochromic behaviors of NEU20 by different modes of UV irradiation. (a) UVB light irradiation. (b) UVC light irradiation.

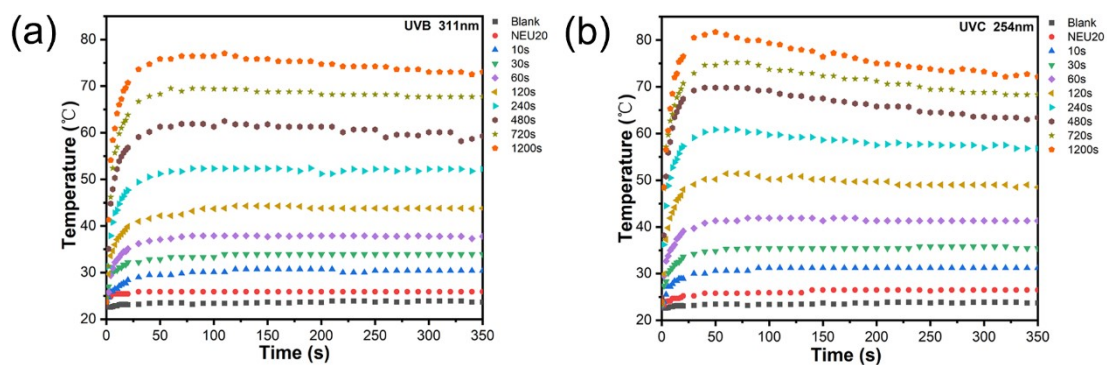

**Fig. S8** Photothermal conversion curves of NEU20-P films on quartz glass with different modes of UV light under laser irradiation (808 nm, 1.12 W cm<sup>-2</sup>). (a) UVB light irradiation. (c) UVC light irradiation.

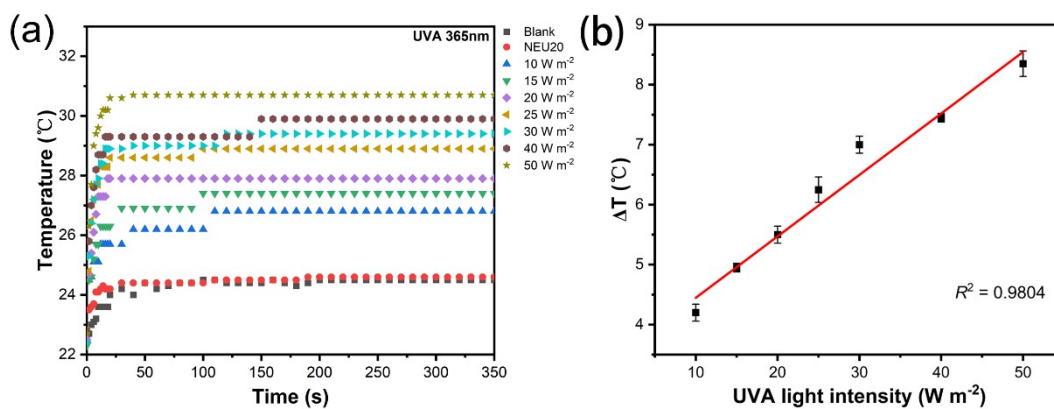

**Fig. S9** (a) Photothermal conversion curves of NEU20-P films on quartz glass with different UVA light intensity under laser irradiation (808 nm, 1.12 W cm<sup>-2</sup>). (b) The linear relationship between the average temperature rise ( $\Delta T$ ) and UV intensity.

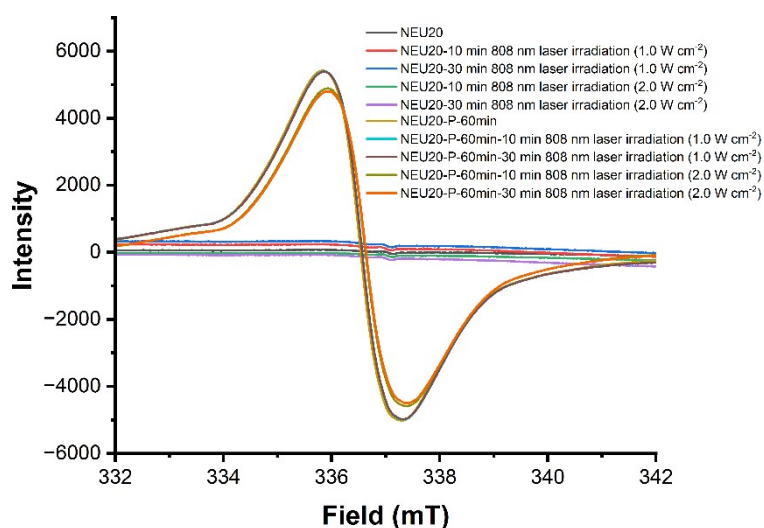

**Fig. S10** EPR spectra of NEU20 and NEU20-P-60min after irradiation with different NIR laser powers.

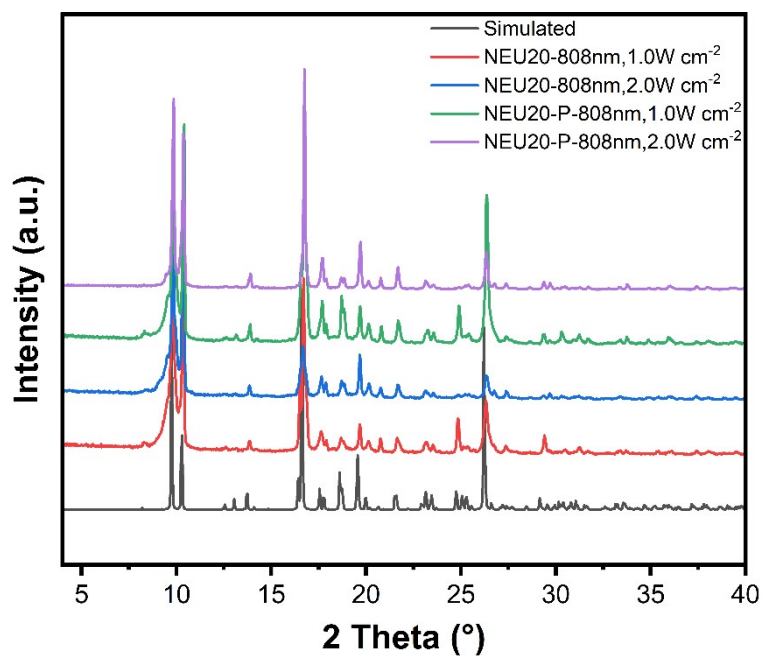

Fig. S11 PXR D for NEU20 and other samples after 30 min of NIR laser radiation at different laser powers.

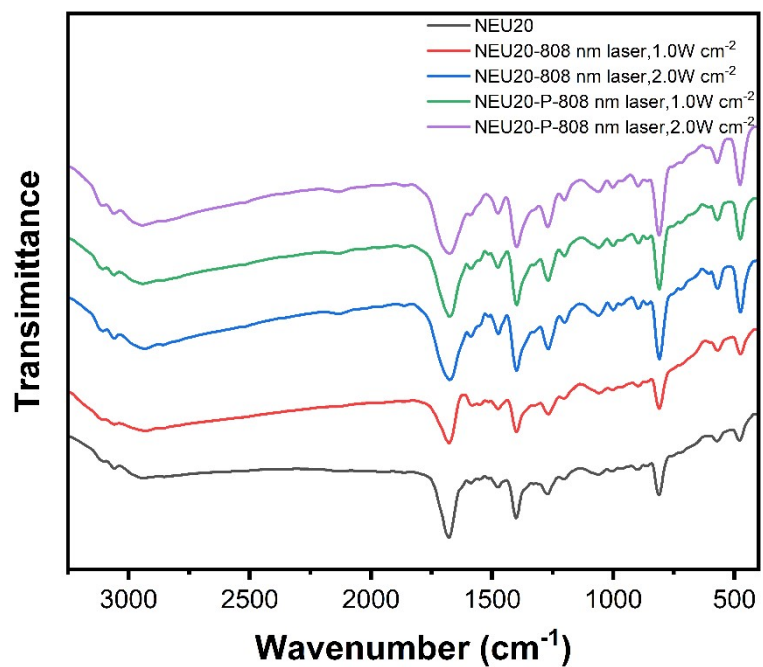

Fig. S12 IR for NEU20 and other samples after 30 min of NIR laser radiation at different laser powers.

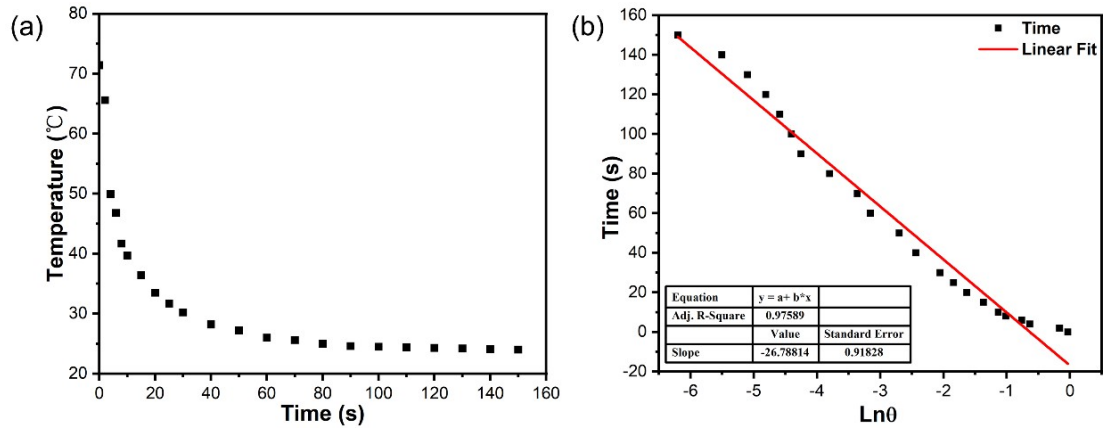

**Fig. S13** (a) The cooling curve of NEU20-P-60min film after irradiation with 808 nm laser (1.12 W·cm<sup>-2</sup>). (b) and its corresponding time-lnθ linear curve.



## 2. Supplementary Table

**Table S1** The photothermal properties in this work compared with previous results of solid materials in the literature.

| Ref       | Classification                          | Samples                              | Light Source                     | Light Intensity         | Added Temperature    | Temperature Rate | $\eta_{PT}$ |     |
|-----------|-----------------------------------------|--------------------------------------|----------------------------------|-------------------------|----------------------|------------------|-------------|-----|
| This work | Photochromic material                   | NEU20                                | 808 nm NIR laser                 | 1.12 W cm <sup>-2</sup> | 49.1 °C in 80 s      | 0.614 °C/s       | 81.3 %      |     |
| 1         |                                         | Zr-PDI MOF                           | 808 nm NIR laser                 | 0.7 W cm <sup>-2</sup>  | 89 °C in 200 s       | 0.445 °C/s       | 52.3 %      |     |
| 2         |                                         | La-MV MOF (film)                     | 808 nm NIR laser                 | 2 W cm <sup>-2</sup>    | 121.9 °C in 200 s    | 0.609 °C/s       | 77 %        |     |
| 3         |                                         | SOF                                  | 660 nm laser                     | 1 W cm <sup>-2</sup>    | 41 °C in 10 min      | 0.068 °C/s       | 50.3 %      |     |
| 4         |                                         | 150-DGIST-4                          | 808 nm NIR laser                 | 2 W cm <sup>-2</sup>    | 158 °C in 80 s       | 1.975 °C/s       | 31.37 %     |     |
| 4         |                                         | 75-DGIST-4                           | 808 nm NIR laser                 | 2 W cm <sup>-2</sup>    | 107 °C in 80 s       | 1.338 °C/s       | 26.61 %     |     |
| 5         |                                         | I-Rb-NDI                             | 808 nm NIR laser                 | 1.6 W cm <sup>-2</sup>  | 113 °C in 2 min      | 0.942 °C/s       | 23.3%       |     |
| 5         |                                         | II-Rb-NDI                            | 808 nm NIR laser                 | 1.6 W cm <sup>-2</sup>  | 141 °C in 2 min      | 1.175 °C/s       | 32.1%       |     |
| 5         |                                         | I-Cs-NDI                             | 808 nm NIR laser                 | 1.6 W cm <sup>-2</sup>  | 86 °C in 2 min       | 0.717 °C/s       | 31.5%       |     |
| 5         |                                         | II-Cs-NDI                            | 808 nm NIR laser                 | 1.6 W cm <sup>-2</sup>  | 145 °C in 2 min      | 1.208 °C/s       | 52.6%       |     |
| 6         |                                         | Inorganic materials                  | Au nanoshells                    | 800 nm NIR laser        | 2 W cm <sup>-2</sup> | 13 °C in 5 min   | 0.043 °C/s  | 13% |
| 6         |                                         |                                      | Au nanorods                      | 800 nm NIR laser        | 2 W cm <sup>-2</sup> | 20 °C in 5 min   | 0.067 °C/s  | 21% |
| 6         | Cu <sub>2-x</sub> Se nanocrystals       |                                      | 800 nm NIR laser                 | 2 W cm <sup>-2</sup>    | 22 °C in 5 min       | 0.073 °C/s       | 22%         |     |
| 7         | Bi <sub>2</sub> S <sub>3</sub> nanorods |                                      | 808 nm semiconductor laser       | 0.25 W cm <sup>-2</sup> | 22 °C in 300 s       | 0.073 °C/s       | 78.1%       |     |
| 8         | H-Pd NSs                                |                                      | 800 nm NIR laser                 | 1 W cm <sup>-2</sup>    | 34.8 °C in 10 min    | 0.058 °C/s       | 35.1%       |     |
| 9         | Co <sub>3</sub> O <sub>4</sub> NPs      |                                      | 808 nm semiconductor diode laser | 1 W cm <sup>-2</sup>    | 30 °C in 5 min       | 0.1 °C/s         | 40.48 %     |     |
| 10        | WO <sub>3-x</sub> @HA                   |                                      | 1064 nm laser                    | 1 W cm <sup>-2</sup>    | 38 °C in 10 min      | 0.063 °C/s       | 43.6 %      |     |
| 11        | Au-on-Au Nanorods                       |                                      | 1060 nm laser                    | 1 W cm <sup>-2</sup>    | 55 °C in 10 min      | 0.092 °C/s       | 67.2 %      |     |
| 12        | Organic materials                       | DTC cocrystals                       | 808 nm NIR laser                 | 0.7 W cm <sup>-2</sup>  | 30 °C in 100 s       | 0.3 °C/s         | 18.8 %      |     |
| 13        |                                         | Selenophene derivative polymer films | 808 nm NIR laser                 | 2.33 W cm <sup>-2</sup> | 30 °C in 3 min       | 0.167 °C/s       | 42.5 %      |     |
| 14        |                                         | Terylenediimide-poly (acrylic acid)  | 660 nm laser                     | 1 W cm <sup>-2</sup>    | 36.8 °C in 10 min    | 0.061 °C/s       | 41 %        |     |

|    |                   |                            |                     |                          |                    |            |        |
|----|-------------------|----------------------------|---------------------|--------------------------|--------------------|------------|--------|
| 15 | Organic materials | RC-BSA NPs                 | 915 nm laser        | 1 W cm <sup>-2</sup>     | 23 °C in 10 min    | 0.038 °C/s | 28.7 % |
| 16 |                   | Por-DPP NPs                | 808 nm NIR laser    | 1 W cm <sup>-2</sup>     | 25.1 °C in 10 min  | 0.042 °C/s | 62.5 % |
| 17 |                   | FA-CNPs                    | 808 nm NIR laser    | 0.7 W cm <sup>-2</sup>   | 36.4 °C in 5 min   | 0.121 °C/s | 36.5 % |
| 18 |                   | TDI NPs                    | 685 nm laser        | 0.7 W cm <sup>-2</sup>   | 35 °C in 10 min    | 0.058 °C/s | 43.8 % |
| 19 |                   | NBDP NPs                   | 808 nm NIR laser    | 0.75 W cm <sup>-2</sup>  | 45 °C in 5 min     | 0.15 °C/s  | 54 %   |
| 20 |                   | TPP-NN NPs                 | 638 nm laser        | 1 W cm <sup>-2</sup>     | 30 °C in 5 min     | 0.1 °C/s   | 36 %   |
| 21 | MOF materials     | TCNQ@ Ru-MOF               | 908 nm laser        | 1.262 W cm <sup>-2</sup> | 39.1 °C in 960 s   | 0.041 °C/s | 29 %   |
| 22 |                   | Ag-Py-2D-MOF               | 808 nm NIR laser    | 0.5 W cm <sup>-2</sup>   | 24.5 °C in 3 min   | 0.136 °C/s | 22.1 % |
| 23 |                   | Dy-2D-MOF                  | 1 sun light         | 0.1 W cm <sup>-2</sup>   | 34.7 °C in 4 min   | 0.145 °C/s | -      |
| 24 |                   | HKUST-1                    | UV-Vis (300-650 nm) | 0.5 W cm <sup>-2</sup>   | 98.5 °C in 30 min  | 0.055 °C/s | 33.6 % |
| 24 |                   | UiO-66                     | UV-Vis (300-650 nm) | 0.5 W cm <sup>-2</sup>   | 17.8 °C in 30 min  | 0.010 °C/s | 5.0 %  |
| 24 |                   | UiO-66-NH <sub>2</sub>     | UV-Vis (300-650 nm) | 0.5 W cm <sup>-2</sup>   | 112.5 °C in 30 min | 0.063 °C/s | 59.3 % |
| 24 |                   | ZIF-8                      | UV-Vis (300-650 nm) | 0.5 W cm <sup>-2</sup>   | 12.8 °C in 30 min  | 0.007 °C/s | 0.3 %  |
| 24 |                   | ZIF-67                     | UV-Vis (300-650 nm) | 0.5 W cm <sup>-2</sup>   | 100.1 °C in 30 min | 0.056 °C/s | 50.0 % |
| 24 |                   | CPO-27-Zn                  | UV-Vis (300-650 nm) | 0.5 W cm <sup>-2</sup>   | 108.2 °C in 30 min | 0.06 °C/s  | 23.8 % |
| 24 |                   | CPO-27-Ni                  | UV-Vis (300-650 nm) | 0.5 W cm <sup>-2</sup>   | 139.7 °C in 30 min | 0.078 °C/s | 93.6 % |
| 24 |                   | CPO-27-Mg                  | UV-Vis (300-650 nm) | 0.5 W cm <sup>-2</sup>   | 100.5 °C in 30 min | 0.056 °C/s | 21.6 % |
| 24 |                   | Fe-MIL-101-NH <sub>2</sub> | UV-Vis (300-650 nm) | 0.5 W cm <sup>-2</sup>   | 113.2 °C in 30 min | 0.063 °C/s | 86.6 % |
| 24 |                   | IRMOF-3                    | UV-Vis (300-650 nm) | 0.5 W cm <sup>-2</sup>   | 86.1 °C in 30 min  | 0.048 °C/s | 25.8 % |

## References

1. B. Lu, Y. Chen, P. Li, B. Wang, K. Mullen and M. Yin, Stable radical anions generated from a porous perylene diimide metal-organic framework for boosting near-infrared photothermal conversion, *Nat. Commun.*, 2019, **10**, 767.
2. S. Wang, S. Li, J. Xiong, Z. Lin, W. Wei and Y. Xu, Near-infrared photothermal conversion of stable radicals photoinduced from a viologen-based coordination polymer, *Chem. Commun.*, 2020, **56**, 7399-7402.
3. W. Z. Li, H. Chen, M. N. Shen, Z. Yang, Z. Fan, J. Xiao, J. Chen, H. Zhang, Z. Wang and X. Q. Wang, Chaotropic effect stabilized radical-containing supramolecular organic frameworks for photothermal therapy, *Small*, 2022, **18**, e2108055.
4. S. Park, J. Lee, H. Jeong, S. Bae, J. Kang, D. Moon and J. Park, Multi-stimuli-engendered

- radical-anionic MOFs: Visualization of structural transformation upon radical formation, *Chem*, 2022, **8**, 1993-2010.
5. H. Ke, X.-M. Zhu, S.-M. Xie, P.-X. Ming and J.-Z. Liao, Ultrastable radicals in naphthalenediimide-based materials and their stimulus-boosting near-infrared photothermal conversion, *Inorg. Chem. Front.*, 2022, **9**, 2568-2574.
  6. C. M. Hessel, V. P. Pattani, M. Rasch, M. G. Panthani, B. Koo, J. W. Tunnell and B. A. Korgel, Copper selenide nanocrystals for photothermal therapy, *Nano Lett*, 2011, **11**, 2560-2566.
  7. J. Jiang, X. Che, Y. Qian, L. Wang, Y. Zhang and Z. Wang, Bismuth sulfide nanorods as efficient photothermal theragnosis agents for cancer treatment, *Frontiers in Materials*, 2020, **7**.
  8. S. Li, K. Gu, H. Wang, B. Xu, H. Li, X. Shi, Z. Huang and H. Liu, Degradable holey palladium nanosheets with highly Active 1D nanoholes for synergetic phototherapy of hypoxic tumors, *J. Am. Chem. Soc.*, 2020, **142**, 5649-5656.
  9. X. Huang, H. Cai, H. Zhou, T. Li, H. Jin, C. E. Evans, J. Cai and J. Pi, Cobalt oxide nanoparticle-synergized protein degradation and phototherapy for enhanced anticancer therapeutics, *Acta Biomater*, 2021, **121**, 605-620.
  10. Y. Ding, R. Huang, L. Luo, W. Guo, C. Zhu and X.-C. Shen, Full-spectrum responsive WO<sub>3-x</sub>@HA nanotheranostics for NIR-II photoacoustic imaging-guided PTT/PDT/CDT synergistic therapy, *Inorg. Chem. Front.*, 2021, **8**, 636-646.
  11. J. Jia, G. Liu, W. Xu, X. Tian, S. Li, F. Han, Y. Feng, X. Dong and H. Chen, Fine-tuning the homometallic interface of Au-on-Au nanorods and their photothermal therapy in the NIR-II window, *Angew. Chem., Int. Ed.*, 2020, **59**, 14443-14448.
  12. Y. Wang, W. Zhu, W. Du, X. Liu, X. Zhang, H. Dong and W. Hu, Cocrystals strategy towards materials for near-infrared photothermal conversion and imaging, *Angew. Chem., Int. Ed.*, 2018, **57**, 3963-3967.
  13. B. Kim, H. Shin, T. Park, H. Lim and E. Kim, NIR-sensitive poly(3,4-ethylenedioxy-selenophene) derivatives for transparent photo-thermo-electric converters, *Adv. Mater.*, 2013, **25**, 5483-5489.
  14. S. Zhang, W. Guo, J. Wei, C. Li, X. J. Liang and M. Yin, Terrylenediimide-based intrinsic theranostic nanomedicines with high photothermal conversion efficiency for photoacoustic imaging-guided cancer therapy, *ACS Nano*, 2017, **11**, 3797-3805.
  15. B. Zhou, Y. Li, G. Niu, M. Lan, Q. Jia and Q. Liang, Near-infrared organic dye-based nanoagent for the photothermal therapy of cancer, *ACS Appl. Mater. Interfaces*, 2016, **8**, 29899-29905.
  16. F. Wu, L. Chen, L. Yue, K. Wang, K. Cheng, J. Chen, X. Luo and T. Zhang, Small-molecule porphyrin-based organic nanoparticles with remarkable photothermal conversion efficiency for in vivo photoacoustic imaging and photothermal therapy, *ACS Appl. Mater. Interfaces*, 2019, **11**, 21408-21416.
  17. Z. He, L. Zhao, Q. Zhang, M. Chang, C. Li, H. Zhang, Y. Lu and Y. Chen, An acceptor-donor-acceptor structured small molecule for effective NIR triggered dual phototherapy of cancer, *Adv. Funct. Mater.*, 2020, **30**, 1910301.
  18. T. Sun, H. Liu, N. Jiang, Q. Wu, C. Li, R. Xia, B. Gao and Z. Xie, Unadulterated organic nanoparticles with small sizes for robust tumor imaging and photothermal treatment, *Adv. Funct. Mater.*, 2021, **31**, 2103714.
  19. N. Song, Y. Li, L. Chen, X. Hu and Z. Xie, Bodipy derivatives as light-induced free radical

- generators for hypoxic cancer treatment, *J. Mater. Chem. B*, 2019, **7**, 3976-3981.
20. R. Xia, X. Zheng, X. Hu, S. Liu and Z. Xie, Photothermal-controlled generation of alkyl radical from organic nanoparticles for tumor treatment, *ACS Appl. Mater. Interfaces*, 2019, **11**, 5782-5790.
  21. T. Zhang, J.-W. Cao, X. Jiang, J. Chen, T. Wang and K.-J. Chen, Band gap modulation enabled by TCNQ loading in a Ru-based metal-organic framework for enhanced near-infrared absorption and photothermal conversion, *Crystal Growth Des.*, 2021, **21**, 729-734.
  22. M. Q. Li, M. Zhao, L. Y. Bi, Y. Q. Hu, G. Gou, J. Li and Y. Z. Zheng, Two-dimensional silver(I)-dithiocarboxylate coordination polymer exhibiting strong near-infrared photothermal effect, *Inorg. Chem.*, 2019, **58**, 6601-6608.
  23. J. Su, N. Xu, R. Murase, Z. M. Yang, D. M. D'Alessandro, J. L. Zuo and J. Zhu, Persistent radical tetrathiafulvalene-based 2D metal-organic frameworks and their application in efficient photothermal conversion, *Angew. Chem., Int. Ed.*, 2021, **60**, 4789-4795.
  24. J. Espin, L. Garzon-Tovar, A. Carne-Sanchez, I. Imaz and D. Maspoch, Photothermal activation of metal-organic frameworks using a UV-Vis light source, *ACS Appl. Mater. Interfaces*, 2018, **10**, 9555-9562.
